# Respiratory and acid–base responses during migration and to exercise by the terrestrial crab *Discoplax (Cardisoma) hirtipes*, with regard to season, humidity and behaviour

Steve Morris

*Integrative and Environmental Physiology, School of Biological Sciences, University of Bristol, Woodland Road, Bristol, BS8 1UG, UK*

e-mail: steve.morris@bristol.ac.uk

*Accepted 3 October 2005*

## Summary

The terrestrial crab *Discoplax hirtipes* (formerly *Cardisoma hirtipes*) exhibits a seasonally dichotomous activity pattern governed by the seasonal rainfall on Christmas Island, with a breeding migration in the wet season. Greater activity in the wet season reflects a release of constraints on ion and water balance independent of changes in exercise physiology. The respiratory responses to walking exercise by *D. hirtipes* were assessed with regard to humidity and season. In the laboratory, crabs walked 38% faster when humidity was high, while the  $O_2$  uptake across the lung became diffusion limited despite a  $Ca^{2+}$ -induced increase in  $O_2$  affinity of the haemocyanin. Crabs walking in 90% relative humidity exhibited a larger metabolic acidosis while re-oxidation of L-lactate was only  $0.49 \text{ mmol l}^{-1} \text{ h}^{-1}$ . The wet-season crabs were more active and exhibited a respiratory acidosis compared with the quiescent dry-season crabs. The migration was close to the

limit of the aerobic scope of the crabs, and the pulmonary oxygen partial pressure ( $P_{O_2}$ ) was depressed, the  $O_2$  uptake diffusion limited and the arterial–venous  $P_{O_2}$  difference diminished. Additional, enforced exercise induced a metabolic acidosis. The optimum strategy for migration would be walking continuously but at a speed within the aerobic scope. *D. hirtipes* is influenced by seasonal rain and responds to lower ambient humidity by limiting exercise. The behavioural response is paramount since the changes in respiratory status were determined primarily by the differences in commitment to, and investment in, walking and not by direct effects of humidity on respiratory physiology.

Key words: land crab, *Cardisoma*, *Discoplax*, exercise, migration, respiration, acid–base, behaviour.

## Introduction

All terrestrial gecarcinid crabs, including the Christmas Island blue crab, *Discoplax hirtipes* (formerly *Cardisoma hirtipes*; Davie, 2002), migrate annually to the coast to release their eggs into the ocean (Gibson-Hill, 1947; Gifford, 1962; Klaassen, 1975; Wolcott, 1988; Hicks et al., 1990; Dela-Cruz and Morris, 1997b; Adamczewska and Morris, 1996, 2001a). On Christmas Island, during the dry season (April–October; Gray, 1995) *D. hirtipes* are restricted in their distribution to areas of freshwater seepages, sometimes more than 1 km from and over 150 m above the ocean, around which they forage for fallen leaves and fruit (Hicks et al., 1990; Adamczewska and Morris, 1996; Dela-Cruz and Morris, 1997a,b; Greenaway and Raghaven, 1998). Unlike the Christmas Island red crab, *Gecarcoidea natalis*, which migrates at the onset of the wet season (November–March), blue crabs initially disperse to forage over a wider area (Dela-Cruz and Morris, 1997b) and only once the wet season is well established (January–February) do they undertake their breeding migration (Hicks et al., 1990; S.M., personal observation).

*D. hirtipes* have well-developed lungs (Farrelly and Greenaway, 1992, 1993) and are competent air breathers (Adamczewska and Morris, 1996; Morris and Dela-Cruz, 1998) but require periodic immersion to facilitate nitrogen excretion (surface water for drinking is inadequate; Dela-Cruz and Morris, 1997b). Thus, the necessity for immersion apparently limits the dry-season range of *D. hirtipes*. A reduced locomotor capacity in land crabs during the dry season would further constrain their distribution, foraging ranges and ability to escape from predators.

There are several studies of exercise capacity in a variety of decapod crustaceans (for reviews, see McMahon, 1981; Herreid and Full, 1988; Full and Weinstein, 1992; Adamczewska and Morris, 2000b; Morris, 2002) but very few of migration physiology, or of seasonality, or under field conditions (e.g. Adamczewska and Morris, 2001a,b). Increasing the walking speed of terrestrial crabs induces fatigue and reduces their distance capacity (e.g. Wood and Randall, 1981a; Full and Herreid, 1984; van Aardt, 1990; Weinstein and Full, 1992; Adamczewska and Morris, 1998a).

In most crustaceans, a functional shortage of O<sub>2</sub> during locomotion is associated with some degree of anaerobiosis, leading to a lactacidosis that is often exacerbated by a respiratory component (e.g. Wood and Randall, 1981b; Booth et al., 1984; Greenaway et al., 1988; Forster et al., 1989; Henry et al., 1994; Adamczewska and Morris, 1998).

Seasonally variable rainfall and/or ambient humidity has received relatively little consideration as a limiting factor in exercise physiology of crabs, although dehydration is known to interfere with O<sub>2</sub> transport in land crabs (Burggren and McMahon, 1981). In ghost crabs, dehydration markedly decreased the maximum aerobic scope (Weinstein et al., 1994). However, the terrestrial *G. natalis* exhibited a seasonal respiratory acidosis that correlated with increased activity and respiration rate during the wet season rather than with hydration state, although hydration state may facilitate the altered behaviour (Adamczewska and Morris, 2000a). The role of ambient humidity in limiting locomotor capacity and activity is important in understanding the migration physiology of *D. hirtipes*.

The majority of studies of locomotion in crustaceans have used exhaustive exercise regimens under laboratory conditions, resulting, unsurprisingly, in a lactacidosis (e.g. McMahon et al., 1979; Greenaway et al., 1988; Forster et al., 1989; Adamczewska and Morris, 1994a,b; Morris and Adamczewska, 2002). However, field studies of *G. natalis* on Christmas Island revealed that these crabs migrated over more than 5 km without becoming anaerobic. Generally, crustaceans, including land crabs, are not adept at re-oxidising lactate and recover relatively slowly from an O<sub>2</sub> debt (e.g. Henry et al., 1994; Adamczewska and Morris, 1998; Morris and Adamczewska, 2002). Slow lactate oxidation is not necessarily problematic if the lactacidosis is a consequence of a 'one-off' sprinting event (e.g. predator avoidance) with a protracted recovery period. However, the blue crab migration is an endurance activity and, if the crabs become anaerobic, low rates of oxidation would lead to both more rapid and more persistent lactacidosis, which will compromise the migration. Thus, it is important to determine the extent of any such acidosis and the recovery capacity of *D. hirtipes* or whether they limit, behaviourally, migration exercise to within their maximum aerobic scope (MAS). Furthermore, it should be determined whether low humidity and dry-season conditions increase the likelihood of anaerobiosis. Is there a respiratory or energetic penalty for exercising under dry conditions or is the risk limited to problems of ion and water homeostasis (e.g. Harris and Kormanik, 1981; Dela-Cruz and Morris, 1997b), which constrain the commitment to exercise?

The migration of blue crabs on Christmas Island requires the establishment of the wet season and this is clearly a general determinant of seasonal behaviour (Hicks et al., 1990) and, thereby, of the energetic demands of locomotion. Preparation for the migration requires a complex of physiological changes (e.g. maturation of reproductive structures and gametes; Linton and Greenaway, 2000) but these are concomitant with a highly dichotomous activity level. However, it is unclear to what

extent increased humidity may release constraints on behaviour and thus allow an increased locomotion and therewith the migration. Alternatively, seasonal changes in physiology may equip the crabs for migration in anticipation of the rigours of the wet season. The energetic investment in walking is seasonal and indicates a proclivity, and a greatly increased commitment, for walking during the wet season. Thus, behaviour may be modulated by ambient humidity but, at the same time, changes in underlying physiological state may also be required in order to facilitate increased levels of exercise.

To establish direct (physiological) and possible indirect (behaviourally mediated) influences of a seasonal rainfall pattern and humidity on exercise and migration in *D. hirtipes*, both field and laboratory studies were conducted in which respiratory, acid-base and metabolite status was determined. On Christmas Island, the respiratory and energetic status of *D. hirtipes* during the wet season (migration) was compared with that of crabs in the dry season (quiescent), both in their natural state *in situ* and with an additional load of 5 min enforced walking. In the laboratory, the influence of humidity was probed by comparing crabs exercised for 5 min at either 40% or 90% relative humidity. Recovery rates and duration following an exercise-induced lactacidosis were determined. The data are evaluated in regards to the seasonal ecology and breeding migration of *D. hirtipes* and land crabs generally.

## Materials and methods

Investigations of walking exercise in *Discoplax hirtipes* Dana 1851 were carried out both in the laboratory and *in situ* on Christmas Island during the dry and wet seasons. *Discoplax hirtipes* were collected from Christmas Island under permit from Parks Australia. In the laboratory, the crabs were housed in communal terrariums (60 cm×1300 cm×25 cm high) at 25±1°C and at more than 80% relative humidity. The terrariums were cleaned and the crabs were fed fruit, dry dog food and dry leaves once a week. The animals were supplied with artificial Christmas Island water (Dela-Cruz and Morris, 1997) to drink and in which to immerse, and were maintained on a 12 h:12 h light:dark regime.

### Exercise in the laboratory – simulations

Male and female blue crabs were used in equal numbers for experiments with body mass ranging from 331 to 557 g (mean 388±43 g). The crabs were deprived of food and water 1 day prior to experimentation. The effects of exercise at either low (40%) or high (≥90%) relative humidity (RH) on the respiratory gas exchange and metabolic status were examined. Blue crabs were sampled either while resting in their terrarium (*N*=6) or after 5 min of exercise in air at 40% RH (*N*=6) or at least 90% RH (*N*=6). The crabs that were exercised walked individually in an arena 1.5 m×3 m at a pace of their choosing, but gentle tactile stimulation was used to encourage crabs to continue walking (speed 2.48 and 1.80 m min<sup>-1</sup> at 90% and 40% RH, respectively). Humidity was maintained using an

electric steam humidifier activated by a relay attached to a micro switch (RS Components Pty Ltd, Smithfield, NSW, Australia) mounted on a Lambrecht 194 hygrometer (Lambrecht, Göttingen, Germany) accurate to  $\pm 2.5\%$  RH.

#### *Sampling and analysis in the laboratory*

Each blue crab was sampled for pulmonary, arterial and venous haemolymph, which was immediately analysed at  $25^{\circ}\text{C}$  for partial pressure and content of  $\text{O}_2$  and  $\text{CO}_2$ , as well as haemolymph pH. A sample of haemolymph was frozen for measurement of osmolality, calcium and metabolites. The crabs were kept in ventilated individual terrariums with fresh drinking water for 24 h prior to experimentation. The carapace of the crabs was drilled at least 24 h prior to experiments to facilitate sampling of haemolymph from the pericardial cavity ( $700\ \mu\text{l}$ ; arterial haemolymph), from the efferent pulmonary vessel ( $300\ \mu\text{l}$ ; for vascular anatomy; see Farrelly and Greenaway, 1993) and directly from the venous sinus ( $800\ \mu\text{l}$ ; venous haemolymph). The entire sampling process required less than 30 s. Samples were taken in chilled 1 ml syringes with 21-gauge hypodermic needles and held on ice for the duration of haemolymph gas and acid-base analysis.

The partial pressure of  $\text{O}_2$  ( $P_{\text{O}_2}$ ) and  $\text{CO}_2$  ( $P_{\text{CO}_2}$ ), as well as the pH of the haemolymph, was measured using a BMS 3 MK II Blood Micro System (Copenhagen, Denmark) thermostatically controlled at  $25 \pm 0.2^{\circ}\text{C}$  and connected to a PHM73 pH/blood gas monitor (Radiometer, Copenhagen, Denmark). The electrodes were calibrated with humidified gases each day before use. The  $\text{O}_2$  electrode was calibrated using  $\text{O}_2$ -free gas and with humidified air and the  $\text{CO}_2$  electrode using 0.5% and 2.5%  $\text{CO}_2$ . The pH electrode was calibrated with Radiometer precision buffers of pH 7.410 (S1510) and 6.865 (S1500), accurate to  $\pm 0.005$  at  $25^{\circ}\text{C}$ . Haemolymph oxygen contents ( $[\text{O}_2]$ ) were measured using the modified Tucker chamber method (Tucker, 1967) as outlined by Bridges et al. (1979). The  $\text{O}_2$  electrode was maintained at  $32^{\circ}\text{C}$  and connected to an oxygen meter (Strathkelvin model 781, Glasgow, Scotland). The changes in  $P_{\text{O}_2}$  were recorded on a pen recorder (model BD111; Kipp and Zonen, Delft, The Netherlands). The haemolymph  $\text{CO}_2$  content was measured using a Corning 965  $\text{CO}_2$  analyser (Medfield, MA, USA; calibrated with  $\text{HCO}_3^-$  standard,  $15\ \text{mmol l}^{-1}$ ).

The haemocyanin content of the haemolymph was measured by spectrophotometric scanning of a  $10\ \mu\text{l}$  haemolymph sample in 1 ml of 1% EDTA in Milli-Q water (Sydney, NSW, Australia). The peak absorbance near 338 nm was used to calculate the haemocyanin concentrations using the extinction coefficient  $2.69\ E_{1\text{cm}}^{1\%}$  (Nickerson and Van Holde, 1971). The haemocyanin concentration was used to derive the maximum capacity for haemocyanin-bound  $\text{O}_2$  of each sample and thereby the relative haemocyanin  $\text{O}_2$  saturation.

An aliquot of the remaining haemolymph samples was mixed (ratio 1:1) with ice-cold  $0.6\ \text{mol l}^{-1}\ \text{HClO}_4$  to denature proteins and was neutralised with  $2.5\ \text{mol l}^{-1}\ \text{K}_2\text{CO}_3$ . The denatured sample was centrifuged at  $10\ 000\ g$  at  $4^{\circ}\text{C}$  for 10 min and the supernatant frozen for subsequent L-lactate

analysis (test kit No. 138 084; Boehringer Mannheim, Mannheim, Germany). Whole haemolymph samples were maintained at  $4^{\circ}\text{C}$  for a maximum of 15 min before freezing for later analysis for glucose (test-kit No. 510; Sigma Diagnostics, Sydney, NSW, Australia) and urate concentrations (Sigma Diagnostics test kit No. 685).

Haemolymph osmolality was measured using a vapour pressure osmometer (Wescor 5100C, Logan, UT, USA) calibrated with two precision standards, 290 and 1000 mOsm. The concentration of  $\text{Ca}^{2+}$  in the haemolymph was measured using an atomic absorption spectrophotometer (GBC 906, Melbourne, Australia) with a sample of haemolymph deproteinised with  $\text{HNO}_3$  ( $0.1\ \text{mol l}^{-1}$ ; ratio 1:1). To suppress interference during measurements, samples and standards were diluted with  $7.2\ \text{mmol l}^{-1}\ \text{LaCl}_3$ .

The concentration of L-lactate from the haemolymph and the changes in the concentration of circulating glucose after 5 min of exercise were monitored at intervals for 24 h in crabs exercised at  $\geq 90\%$  RH by repeated sampling ( $50\ \mu\text{l}$ ) using an ice-cold  $100\ \mu\text{l}$  Hamilton syringe with a 26-gauge needle inserted through the arthroal membrane at the base of the walking legs. During recovery, blue crabs were maintained individually and supplied with a continuous flow of humidified air.

#### *Exercise in the field – in situ*

*D. hirtipes* were sampled on Christmas Island during two seasons: June (dry season), when the crabs were quiescent, and during the following February (wet season), when the blue crabs were engaged in the seaward breeding migration. In June, sampling was carried out at Ross Hill Gardens ( $10^{\circ}29'11''\text{S}$ ,  $105^{\circ}40'41''\text{E}$ ), where the blue crabs were congregated around freshwater seepages. During the February wet season, the crabs were migrating from Ross Hill Gardens to the coast, and sampling was carried out at a lower forest terrace, approximately 500 m from Ross Hill Gardens ( $10^{\circ}29'29''\text{S}$ ,  $105^{\circ}40'43''\text{E}$ ). During the dry season study period (June), RH was as low as 63% whereas in the wet season period (February) it never fell below 100% and quite often the air was supersaturated with water vapour (mist).

Two groups of crabs were sampled during each of the study seasons ( $N > 6$  for each group). The first group was the free-ranging crabs (FR); this group comprised crabs that were above ground outside of their burrows. Each crab was captured for haemolymph sampling, but any crabs that attempted to escape prior to capture were marked and excluded from the experiment. A second group of crabs was exercised for 5 min. A blue crab was selected at random and an observer approached the crab until the crab began to move away; when the crab stopped walking, the observer approached the crab again. After 5 min of this exercise the crab was captured for haemolymph sampling.

Samples were taken and analysed as described for the samples from crabs exercised in the laboratory (above) except that the samples were transported in sealed syringes on ice for the 14 min drive to the Research Station on Christmas Island

and different electrodes were used.  $P_{O_2}$  was determined with a flow-through micro oxygen probe (Microelectrodes, MI16-730, Bedford, NH, USA) connected to a PHM73 pH/blood gas monitor (Radiometer) calibrated at ambient temperature. Haemolymph pH was measured with a flow-through micro pH-probe (Microelectrodes, MI16-705), connected to the PHM73 also at ambient temperature, which remained effectively constant throughout ( $25 \pm 2^\circ\text{C}$ ). Changes in  $P_{O_2}$  of the Tucker chamber were timed with a stopwatch until a linear rate of change was recorded and the  $P_{O_2}$  then interpolated to injection time (i.e. time 0). Haemolymph  $\text{CO}_2$  content ( $[\text{CO}_2]$ ) was measured with a  $P_{\text{CO}_2}$  electrode (model E5037/SI) connected to a PHM73 pH/blood gas monitor using a Cameron chamber also at  $32^\circ\text{C}$  (Cameron, 1971) and calibrated with fresh  $15 \text{ mmol l}^{-1} \text{ NaHCO}_3$  standards. The changes in  $P_{\text{CO}_2}$  were recorded until a linear rate change was achieved and interpolated to injection time. A sample of the haemolymph was frozen and saved for analysis of metabolites and selected ions. Samples for  $\text{Mg}^{2+}$  analysis were prepared as for  $\text{Ca}^{2+}$  (above), as were samples for  $\text{Na}^+$  and  $\text{K}^+$  analysis, except they were diluted in  $\text{CsCl}$ . The  $\text{Cl}^-$  concentration was measured using a CMT10 titrator (Radiometer) calibrated with  $100 \text{ mmol l}^{-1} \text{ NaCl}$ .

Muscle samples were also obtained for measurement of metabolites. A different group of blue crabs was used for tissue sampling. The crabs were encouraged to autotomise the penultimate walking leg, and the muscle tissue ( $0.3 \text{ g}$  from the merus) was extracted from either FR crabs ( $N=8$ ) or crabs exercised for  $5 \text{ min}$  ( $N=8$ ). The muscle tissue was immediately deposited into a pre-weighed tube with  $2 \text{ ml}$  of ice-cold  $\text{HClO}_4$  ( $0.6 \text{ mol l}^{-1}$ ) to deproteinise the sample. The vials with the muscle tissue were weighed and then homogenised with an OMNI 1000 homogeniser (Marietta, GA, USA) and frozen until further processing as described previously (Adamczewska and Morris, 1996, 1998a, 2001a). The muscle tissue was analysed for L-lactate (using Boehringer test kit no. 138 084) as well as glucose by methods described by Bergmeyer (1985). The concentrations of metabolites in tissues were expressed in  $\text{mmol kg}^{-1}$  wet tissue mass. The muscle and haemolymph samples were air-freighted to the laboratory at  $-40^\circ\text{C}$  in dry ice.

#### Data analysis

All data, except the determinations of L-lactate and glucose in the haemolymph during post-exercise recovery, were independent with regard to treatment (e.g. exercise vs resting) and were analysed for treatment effects by analysis of variance (ANOVA). Data sets containing means with heterogeneous variance (Bartlett's and Levene's tests) were log or square-root transformed before analysis. *Post-hoc* testing was by Tukey's HSD test. The changes in L-lactate and glucose concentration of the haemolymph following exercise were analysed using a one-way repeated measures design. Pulmonary, arterial and venous haemolymph samples were not completely independent within treatments since they were taken from each crab, and thus comparisons between these values were made using serial

Friedman's two-factor ANOVA for ranked related samples (non-independent). This is comparable to a one-factor ANOVA and was verified using Minitab 14 in addition to Systat, which was employed for the other analyses. In all cases,  $P < 0.05$  was taken as significant. Values are presented as means  $\pm$  S.E.M.

## Results

### Laboratory exercise studies – haemolymph gas transport and acid–base status

In the laboratory trials crabs exercised in 90% RH walked 38% faster ( $2.48 \pm 0.43 \text{ m min}^{-1}$ ) than the  $1.80 \pm 0.29 \text{ m min}^{-1}$  achieved by those at 40% RH (*t*-test,  $P=0.018$ ,  $N=12$  at each humidity). The  $P_{O_2}$  of pulmonary haemolymph ( $P_{PO_2}$ ) decreased from  $12.8 \pm 0.6 \text{ kPa}$  in crabs at rest to  $5.2 \pm 1.1$  and  $2.5 \pm 0.2 \text{ kPa}$  after  $5 \text{ min}$  of exercise at 40% or 90% RH, respectively (Table 1). The decline in  $P_{PO_2}$  was greater for crabs exercised at 90% RH than for those at 40% RH. The  $P_{O_2}$  of pulmonary and arterial haemolymph was similar in the exercised crabs, but in crabs at rest the  $P_{PO_2}$  was higher than the  $P_{AO_2}$  by  $3.8 \text{ kPa}$ . Despite the fluctuations in the  $P_{O_2}$  of the arterial and pulmonary haemolymph, the venous  $P_{O_2}$  was low and similar in all three groups ( $1.05 \pm 0.12$  to  $1.17 \pm 0.09 \text{ kPa}$ ; Table 1).  $[\text{O}_2]$  in arterial and pulmonary haemolymph was generally similar in resting crabs and in crabs exercised for  $5 \text{ min}$  (Table 1). However, while the  $[\text{O}_2]_p$  of crabs at rest ( $0.99 \text{ mmol l}^{-1}$ ) and after  $5 \text{ min}$  of exercise at 40% RH ( $0.94 \text{ mmol l}^{-1}$ ) were similar, that in crabs exercised for  $5 \text{ min}$  at 90% RH was significantly greater at  $1.28 \pm 0.13 \text{ mmol l}^{-1}$  (Table 1). This difference was not reflected in haemocyanin (Hc)  $\text{O}_2$  saturation and was due to an unusually high  $[\text{Hc}]$ . The mean  $[\text{O}_2]_v$  at  $0.41 \pm 0.06 \text{ mmol l}^{-1}$  was significantly lower than the  $[\text{O}_2]_a$  and  $[\text{O}_2]_p$  and was similar for all three treatment groups. Despite the fluctuations in  $[\text{O}_2]_p$ , the Hc saturation was high (at least 87%; Table 1). The saturation of the Hc in venous haemolymph ranged from 45% in crabs at rest to 28% in the 90% RH group, which was significantly lower than that of both rested crabs and those exercised at 40% RH (Table 1).

The effects of exercise at 90% RH on haemolymph  $\text{CO}_2$  and pH were more extreme than those at 40% RH (ANOVA; Table 1).  $[\text{CO}_2]$  in the haemolymph was similar in the pulmonary, arterial and venous haemolymph within each exercise regimen (Table 1). The haemolymph  $[\text{CO}_2]$  of crabs after  $5 \text{ min}$  of exercise (e.g.  $[\text{CO}_2]_a$   $12.51$  and  $12.79 \text{ mmol l}^{-1}$  at 40% and 90% RH, respectively) was significantly lower than in the crabs at rest (e.g.  $[\text{CO}_2]_a$   $17.49 \text{ mmol l}^{-1}$ ). By contrast, the haemolymph  $P_{\text{CO}_2}$  of exercised crabs (e.g.  $P_{V\text{CO}_2}$   $2.24$  and  $2.69 \text{ kPa}$  at 40% and 90% RH, respectively) was higher than that of crabs at rest (e.g.  $P_{V\text{CO}_2}=1.56 \text{ kPa}$ ; Table 1). The pH of the haemolymph was similar in pulmonary, arterial and venous haemolymph of crabs within each exercise regimen (Table 1). However, the pH of the haemolymph in crabs exercised for  $5 \text{ min}$  was significantly lower in exercised crabs ( $\text{pH}_v=7.35$ ) than in those at rest ( $\text{pH}_v=7.59$ ). This relative acidosis was

more pronounced in crabs exercised in 90% RH ( $pH_a=7.40$  vs  $pH_a=7.49$ ; Table 1).

#### Osmolality and metabolites in the haemolymph

Osmolality (OP) was approximately 70 mOsm greater in the laboratory crabs compared with the free-ranging *D. hirtipes* on Christmas Island (below), although haemolymph  $Ca^{2+}$  levels were lower. Exercise promoted an increase in OP from 574 to 677 mOsm after 5 min exercise at 90% RH, while the increase in OP after exercise at 40% RH was considerably smaller (Table 2). The increase in OP was reflected in a 5.1-fold increase in  $Ca^{2+}$  concentration in the haemolymph of blue crabs after 5 min exercise at 90% RH but there was no significant increase during exercise at 40% RH (Table 2). There was no detectable change in haemolymph urate concentration ( $0.04$ – $0.10$  mmol  $l^{-1}$ ), which was within the range for field data (below), consequent to exercise in blue crabs, nor in the concentration of glucose ( $0.35$ – $0.60$  mmol  $l^{-1}$ ). Exercise had a pronounced effect on haemolymph L-lactate concentration, which was  $0.24$  mmol  $l^{-1}$  in resting laboratory animals but increased to  $3.68$  and  $5.41$  mmol  $l^{-1}$  after 5 min exercise at 90% and 40% RH, respectively.

#### Recovery from exercise at 90% RH

Subsequent to 5 min exercise at 90% RH, L-lactate in the haemolymph continued to accumulate for at least the next 30 min and exceeded 4 mmol  $l^{-1}$  (Fig. 1). Haemolymph L-lactate was then progressively cleared and although after 5 h recovery the mean L-lactate concentration was still  $1.9$  mmol  $l^{-1}$ , this was no longer statistically elevated compared with values from resting crabs. L-lactate declined to  $0.19$  mmol  $l^{-1}$  after 24 h recovery. Haemolymph glucose varied in the haemolymph of post-exercised *D. hirtipes* differently to L-lactate (Fig. 1). The haemolymph glucose increased from  $0.35$  mmol  $l^{-1}$  in resting crabs for at least 2 h after exercise to

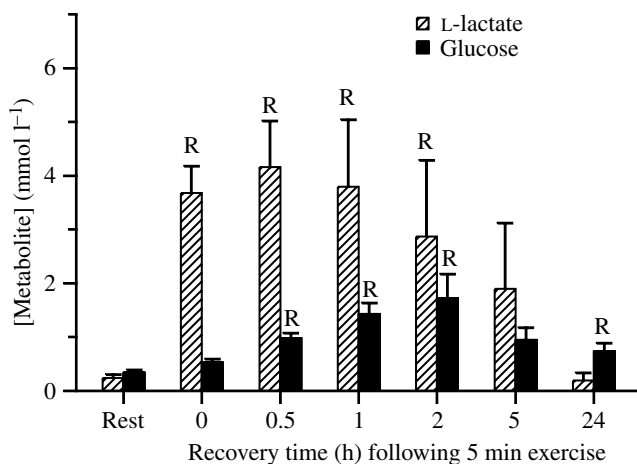

Fig. 1. The concentration of L-lactate and glucose in the haemolymph during 24 h recovery from 5 min of exercise at 90% relative humidity in the laboratory. R, significant difference between that sample group and crabs at rest ( $P < 0.05$ ,  $N = 8$ ). Time 0 is time immediately after exercise.

Table 1. Haemolymph respiratory and acid-base status of laboratory acclimated Discoplax hirtipes at rest or after 5 min of exercise at either 40% or 90% relative humidity (RH)

|                     | $P_{O_2}$ (kPa)          |                        |                          | $[O_2]$ (mmol $l^{-1}$ )  |                          |                          | % Hc $O_2$ saturation    |                        |                              |
|---------------------|--------------------------|------------------------|--------------------------|---------------------------|--------------------------|--------------------------|--------------------------|------------------------|------------------------------|
|                     | Pulmonary                | Arterial               | Venous                   | Pulmonary                 | Arterial                 | Venous                   | Pulmonary                | Arterial               | Venous                       |
| Resting             | 12.75±0.64               | 8.88±1.67 <sup>p</sup> | 1.05±0.12 <sup>a,p</sup> | 0.99±0.12                 | 0.87±0.12                | 0.46±0.07 <sup>a</sup>   | 96.65±6.54               | 83.58±4.61             | 44.80±4.21 <sup>a,p</sup>    |
| Exercised at 40% RH | 5.24±1.13 <sup>†</sup>   | 4.73±1.26 <sup>†</sup> | 1.17±0.09 <sup>a,p</sup> | 0.94±0.18                 | 0.78±0.10                | 0.40±0.06 <sup>a</sup>   | 89.03±5.01               | 79.28±6.92             | 39.64±2.36 <sup>a,p</sup>    |
| Exercised at 90% RH | 2.49±0.22 <sup>a,†</sup> | 3.62±0.59 <sup>†</sup> | 1.12±0.13 <sup>a,p</sup> | 1.28±0.13                 | 1.20±0.08 <sup>a,†</sup> | 0.39±0.05 <sup>a,p</sup> | 87.21±5.03               | 83.87±4.10             | 28.48±4.95 <sup>a,p,*†</sup> |
|                     | $P_{CO_2}$ (kPa)         |                        |                          | $[CO_2]$ (mmol $l^{-1}$ ) |                          |                          | pH                       |                        |                              |
|                     | Pulmonary                | Arterial               | Venous                   | Pulmonary                 | Arterial                 | Venous                   | Pulmonary                | Arterial               | Venous                       |
| Resting             | 1.70±0.09                | 1.37±0.17              | 1.56±0.10                | 16.47±1.89                | 17.49±1.90               | 17.34±1.81               | 7.63±0.04                | 7.60±0.04              | 7.59±0.04                    |
| Exercised at 40% RH | 1.76±0.18                | 2.10±0.15 <sup>†</sup> | 2.24±0.16 <sup>†</sup>   | 13.11±1.43                | 12.51±1.53 <sup>†</sup>  | 13.86±1.15               | 7.49±0.02 <sup>†</sup>   | 7.45±0.03 <sup>†</sup> | 7.35±0.04 <sup>†</sup>       |
| Exercised at 90% RH | 2.14±0.22 <sup>†</sup>   | 2.34±0.22 <sup>†</sup> | 2.69±0.19 <sup>a,†</sup> | 12.20±0.81 <sup>†</sup>   | 12.79±0.73 <sup>†</sup>  | 11.89±0.62 <sup>†</sup>  | 7.40±0.03 <sup>a,†</sup> | 7.40±0.03 <sup>†</sup> | 7.35±0.03 <sup>†</sup>       |

There were no significant differences between pulmonary and arterial samples. Significant differences compared with arterial samples are indicated by an 'a', while differences compared with pulmonary are indicated by a 'p' above the venous sample for each treatment group. \* indicates a difference in values of crabs exercised at 90% compared with those at 40% RH. † indicates a difference between crabs exercised at the respective humidity and those at rest. Differences between treatments were assessed by parametric analysis (ANOVA) with *post-hoc* testing (Tukey's HSD pair-wise comparison), while differences within treatments (i.e. haemolymph type) were assessed using Friedman's two-factor ANOVA for related samples, a non-parametric equivalent to one-factor ANOVA,  $N = 8$  for each treatment; total  $N = 64$ .

Table 2. Osmolality (OP), calcium, urate, L-lactate and glucose concentration in the haemolymph of *D. hirtipes* during various exercise regimes carried out in the laboratory

|                |        | OP (mOsm)              | Ca <sup>2+</sup> (mmol l <sup>-1</sup> ) | Urate (mmol l <sup>-1</sup> ) | L-lactate (mmol l <sup>-1</sup> ) | Glucose (mmol l <sup>-1</sup> ) |
|----------------|--------|------------------------|------------------------------------------|-------------------------------|-----------------------------------|---------------------------------|
| Resting        | 90% RH | 573.6±6.8              | 3.11±0.67                                | 0.04±0.005                    | 0.24±0.06                         | 0.35±0.04                       |
| 5 min exercise | 40% RH | 601.5±15* <sup>†</sup> | 4.94±0.91 <sup>†</sup>                   | 0.101±0.048                   | 5.41±0.70* <sup>†</sup>           | 0.6±0.31                        |
|                | 90% RH | 676.9±4.9*             | 15.82±0.54*                              | 0.069±0.021                   | 3.68±0.49*                        | 0.53±0.06                       |

Exercise for 5 min under either 40% or 90% relative humidity (RH) and resting values at 90% RH are compared. Values are means ± S.E.M.

\*, different from resting value; <sup>†</sup>, different from 90% RH exercised value.

1.73 mmol l<sup>-1</sup>, and this hyperglycaemia persisted even after 24 h recovery, at which time the concentration was still 0.74 mmol l<sup>-1</sup> (Fig. 1).

#### *In situ assessment of exercise in D. hirtipes on Christmas Island*

In each of the sample groups, the  $P_{O_2}$  in the arterial and pulmonary haemolymph was similar but decreased significantly in the venous samples (Table 3). In June (dry), the  $P_{PO_2}$  of exercised crabs (6.5±1.8 kPa) was significantly lower than in the FR crabs (12.0±2.8 kPa). By contrast, during February (wet), the mean  $P_{PO_2}$  of FR and the exercised crabs was similar (combined mean 5.5±1.2 kPa; Table 3).

Like the  $P_{O_2}$ ,  $[O_2]$  in the haemolymph was similar in pulmonary and arterial haemolymph (Table 3). However, while the  $[O_2]_p$  of FR and exercised crabs was similar in June, in February (wet) the  $[O_2]_p$  of exercised crabs (0.66±0.04 mmol l<sup>-1</sup>) was lower than in the FR (migrating) crabs (1.00±0.15 mmol l<sup>-1</sup>). The venous  $[O_2]$  ranged from 0.26 to 0.36 mmol l<sup>-1</sup> and was not significantly different among any of the groups (Table 3).

Despite the differences in  $P_{O_2}$  and  $[O_2]$  between some treatments, the Hc was always well saturated at the gas exchange surfaces in all sample groups (pulmonary Hc  $O_2$ >95%) but decreased to below 30% in the venous haemolymph of crabs exercised in the dry season (Table 3).

There was no difference in  $[CO_2]$  between the pulmonary, arterial and venous haemolymph within any of the sample groups (Table 3). While the mean haemolymph  $[CO_2]$  in crabs sampled in June was similar in FR and exercised crabs (e.g.  $[CO_2]_v$ =16.70±0.90 and 16.60±1.02 mmol l<sup>-1</sup> respectively), during the February wet season the  $[CO_2]$  of exercised crabs (e.g.  $[CO_2]_v$ =11.38±0.57 mmol l<sup>-1</sup>) was significantly lower than in FR crabs ( $[CO_2]_v$ =17.28±1.86 mmol l<sup>-1</sup>).

The pH of pulmonary, arterial and venous haemolymph was similar within each of the sample groups, but exercise induced a haemolymph acidosis (Table 3). The haemolymph of crabs sampled in June (dry) had a  $pH_v$  of 7.60±0.03, but after 5 min of exercise this decreased to  $pH_v$  7.26±0.08. Similarly, in crabs sampled in February (wet), the haemolymph  $pH_v$  of 7.45±0.03, for example, decreased to an even lower value of 6.99±0.04. While the relative acidosis induced by 5 min enforced walking was similar in both seasons, the initial haemolymph pH of FR crabs sampled in February was significantly lower than that of the FR crabs sampled in June (Table 3).

#### *Haemolymph and tissue metabolites*

The concentration of glucose in the haemolymph of FR crabs sampled in February (wet season; 0.22±0.03 mmol l<sup>-1</sup>) was almost twice that of FR crabs sampled in June (dry; 0.13±0.02 mmol l<sup>-1</sup>; Table 4). Likewise, the increase in haemolymph glucose after 5 min of exercise in February (0.14 mmol l<sup>-1</sup>) was twice that measured in June (Table 4). While the glucose concentration in the muscle of FR crabs was comparable with the concentrations in the haemolymph, after 5 min of exercise the increase in muscle [glucose] was much greater at 1.1 mmol kg<sup>-1</sup> in June and 0.7 mmol kg<sup>-1</sup> in February (Table 4).

The concentration of urate in the haemolymph was similar in both seasons (0.075–0.121 mmol l<sup>-1</sup>) and did not change after 5 min of exercise (Table 5). Haemolymph L-lactate was similar in the two sampling seasons and increased from a mean of 0.76±0.17 mmol l<sup>-1</sup> in FR crabs to a mean of 9.2±1.2 mmol l<sup>-1</sup> after 5 min of exercise (Table 4). The concentration of L-lactate in the muscle tissue was consistently higher than in the haemolymph and increased from a mean (combining both dry and wet season data) of 2.3±0.81 mmol kg<sup>-1</sup> in resting crabs to a mean of 13.9±2.5 mmol kg<sup>-1</sup> after 5 min of exercise (Table 4).

#### *Osmotic and salt balance*

There was no difference between the haemolymph OP of *D. hirtipes* sampled in the dry season and those sampled in the wet season (Table 5). Exercising blue crabs for 5 min promoted an increase in haemolymph osmolality of 73.1 mOsm in June and 58.8 mOsm in February (Table 5). Similarly, there was no seasonal variation in haemolymph Ca<sup>2+</sup> concentration, but the 5 min exercise promoted a 40–45% increase in circulating Ca<sup>2+</sup> levels (Table 5). During the June sampling season, exercised *D. hirtipes*, compared with FR crabs, showed no change in Na<sup>+</sup> and Cl<sup>-</sup>, but Mg<sup>2+</sup> and K<sup>+</sup> were increased by 31% and 22%, respectively (Table 5).

#### **Discussion**

The behaviour of *Discoplax hirtipes* is an important determining component in the extent of walking exercise, both in the laboratory at differing relative humidity and during different seasons. The varying commitment that the crabs make to walking and thus on metabolic demand is manifest in the respiratory, acid–base and metabolite status of exercised and naturally migrating crabs.

### Respiratory competence of the lungs in supporting exercise

Afferent systemic haemolymph  $O_2$  saturation was not a simple limitation to exercise in *D. hirtipes*. In the laboratory, the  $P_{pO_2}$  and  $P_{aO_2}$  values in the haemolymph in resting *D. hirtipes* were similar to previous *in situ* values (Adamczewska and Morris, 1996) and to those in quiescent crabs in the field during the dry season. The haemolymph of *D. hirtipes* has a high  $O_2$ -carrying capacity ( $\sim 1 \text{ mmol l}^{-1}$ ) and is normally well saturated leaving the lungs (Farrelly and Greenaway, 1994; Adamczewska and Morris, 1996). The Hc in *D. hirtipes* has a very high affinity for  $O_2$  ( $P_{50}=0.62 \text{ kPa}$  at pH 7.8 and  $25^\circ\text{C}$ ; Dela-Cruz and Morris, 1997a) and saturates at  $P_{O_2}$  values well below those in resting crabs.

The index  $L_{\text{diff}}$  (Piiper, 1982; Taylor and Taylor, 1992) assesses diffusion limitation to gas exchange and, for terrestrial crabs, is generally between 0.4 and 0.5 (Innes and Taylor, 1986; Taylor and Taylor, 1992; Adamczewska and Morris, 1998). *D. hirtipes* resting in the laboratory or quiescent in the field showed typical  $L_{\text{diff}}$  values of  $0.41\pm 0.03$  and  $0.44\pm 0.14$ , respectively, characteristic of an air-breather (Morris and Dela-Cruz, 1998).

The relative haemolymph flow through the lungs of resting *D. hirtipes* was 82.1%, with only 17.9% through the gills (S.M., unpublished observation) as determined using an injected radiolabelled micro-sphere method (e.g. Taylor and Greenaway, 1984). The gills may be important in the excretion of  $CO_2$  (Farrelly and Greenaway, 1994) but this could not be substantiated (see also Dela-Cruz and Morris, 1997a). The only significant (Friedmans test) decrease in haemolymph  $[CO_2]$  was during lung transit ( $-0.87\pm 0.36 \text{ mmol l}^{-1}$ ), which supports the contrary suggestion that  $CO_2$  excretion is over the lungs. The  $[CO_2]$  in the haemolymph of resting *D. hirtipes* was between 16.5 and  $17.3 \text{ mmol l}^{-1}$  and was very similar to both previous laboratory (Farrelly and Greenaway, 1994) and field values (Adamczewska and Morris, 1996). Similarly, the  $P_{CO_2}$  and pH values of the two resting groups of *D. hirtipes* (laboratory and dry season field crabs) were similar to those in previous *in situ* studies (Adamczewska and Morris, 1996).

### The influence of humidity on exercise in the laboratory

Rather than low humidity exacerbating the demands of exercise on respiration, increasing the humidity encouraged the crabs to a greater commitment to walking. In the laboratory, exercised *D. hirtipes* exhibited pronounced reductions in the haemolymph  $P_{O_2}$ , especially in the  $P_{pO_2}$ , which was reduced by 59% and 80% in crabs exercised at 40% RH and 90% RH, respectively. These decreases are consistent with a partial failure of the lungs to oxygenate the haemolymph, especially in crabs exercising in air at 90% RH. The  $L_{\text{diff}}$  for animals exercised at 40% RH increased to  $0.77\pm 0.07$ , and at 90% RH to  $0.93\pm 0.02$ , indicating severe diffusion limitation in

Table 3. Haemolymph respiratory and acid-base status of Discoplax hirtipes sampled on Christmas Island during June (dry season) or February (wet season)

|                  | $P_{O_2}$ (kPa)              |                              |                                  | $[O_2]$ (mmol l <sup>-1</sup> ) |                                |                                | % Hc $O_2$ saturation |                 |                                 |
|------------------|------------------------------|------------------------------|----------------------------------|---------------------------------|--------------------------------|--------------------------------|-----------------------|-----------------|---------------------------------|
|                  | Pulmonary                    | Arterial                     | Venous                           | Pulmonary                       | Arterial                       | Venous                         | Pulmonary             | Arterial        | Venous                          |
| June – FR        | 12.00 $\pm$ 2.79             | 10.26 $\pm$ 2.69             | 0.89 $\pm$ 0.05 <sup>a,p</sup>   | 0.92 $\pm$ 0.09                 | 0.86 $\pm$ 0.13                | 0.36 $\pm$ 0.08 <sup>a,p</sup> | 100.9 $\pm$ 8.6       | 92.2 $\pm$ 11.3 | 44.9 $\pm$ 9.5 <sup>a,p</sup>   |
| June – exercised | 6.51 $\pm$ 1.84 <sup>†</sup> | 5.44 $\pm$ 1.83 <sup>†</sup> | 1.76 $\pm$ 0.24 <sup>†,p</sup>   | 1.10 $\pm$ 0.13                 | 1.01 $\pm$ 0.15                | 0.33 $\pm$ 0.04 <sup>a,p</sup> | 99.3 $\pm$ 11.5       | 89.4 $\pm$ 7.3  | 29.7 $\pm$ 2.3 <sup>†,a,p</sup> |
| February – FR    | 5.75 $\pm$ 1.65 <sup>*</sup> | 3.93 $\pm$ 1.55 <sup>*</sup> | 0.73 $\pm$ 0.08 <sup>a,p</sup>   | 1.00 $\pm$ 0.15                 | 0.91 $\pm$ 0.08                | 0.36 $\pm$ 0.07 <sup>a,p</sup> | 105.3 $\pm$ 3.0       | 101.0 $\pm$ 7.1 | 39.4 $\pm$ 4.0 <sup>a,p</sup>   |
| Feb – exercised  | 5.32 $\pm$ 0.80              | 4.10 $\pm$ 0.61              | 0.96 $\pm$ 0.23 <sup>*,a,p</sup> | 0.66 $\pm$ 0.04 <sup>*,†</sup>  | 0.68 $\pm$ 0.03 <sup>*,†</sup> | 0.26 $\pm$ 0.05 <sup>a,p</sup> | 95.3 $\pm$ 11.5       | 99.2 $\pm$ 10.7 | 41.2 $\pm$ 11.4 <sup>a,p</sup>  |

  

|                  | $[CO_2]$ (mmol l <sup>-1</sup> ) |                                 |                                 | pH                             |                                |                                |
|------------------|----------------------------------|---------------------------------|---------------------------------|--------------------------------|--------------------------------|--------------------------------|
|                  | Pulmonary                        | Arterial                        | Venous                          | Pulmonary                      | Arterial                       | Venous                         |
| June – FR        | 15.17 $\pm$ 1.88                 | 16.26 $\pm$ 1.57                | 16.70 $\pm$ 0.90                | 7.60 $\pm$ 0.03                | 7.62 $\pm$ 0.02                | 7.60 $\pm$ 0.03                |
| June – exercised | 14.64 $\pm$ 1.21                 | 15.25 $\pm$ 1.33                | 16.60 $\pm$ 1.02                | 7.30 $\pm$ 0.07 <sup>†</sup>   | 7.31 $\pm$ 0.08 <sup>†</sup>   | 7.26 $\pm$ 0.08 <sup>†</sup>   |
| February – FR    | 17.34 $\pm$ 1.82                 | 16.14 $\pm$ 1.81                | 17.28 $\pm$ 1.86                | 7.46 $\pm$ 0.02 <sup>*</sup>   | 7.48 $\pm$ 0.03 <sup>*</sup>   | 7.45 $\pm$ 0.03 <sup>*</sup>   |
| Feb – exercised  | 11.02 $\pm$ 0.66 <sup>*,†</sup>  | 11.18 $\pm$ 0.82 <sup>*,†</sup> | 11.38 $\pm$ 0.57 <sup>*,†</sup> | 7.09 $\pm$ 0.07 <sup>*,†</sup> | 7.11 $\pm$ 0.07 <sup>*,†</sup> | 6.99 $\pm$ 0.04 <sup>*,†</sup> |

Pulmonary, arterial and venous haemolymph samples were taken from free-ranging crabs (FR) or crabs exercised for 5 min. There were no differences between pulmonary and arterial haemolymph in any of the parameters measured. Significant differences between venous and arterial samples are indicated by an 'a', while differences between venous and pulmonary are indicated by a 'p' above the venous sample for each treatment group. <sup>†</sup> indicates a significant difference between FR and exercised crabs within each season (June or February). \* indicates a significant difference between seasons (June vs February) for either exercised crabs or for rested crabs. Differences between treatments were assessed by parametric analysis (ANOVA) with *post-hoc* testing (Tukey's HSD pair-wise comparison), while differences within treatments (i.e. haemolymph type) were assessed using Friedman's two-factor ANOVA for related samples, a non-parametric equivalent to one-factor ANOVA.  $N=8$  for each treatment; total  $N=64$ .

Table 4. *Haemolymph and leg muscle tissue concentration of glucose and L-lactate in D. hirtipes sampled on Christmas Island during June (dry season) or February (wet season)*

|                |           | [Glucose]                             |                                        | [L-lactate]                           |                                        |
|----------------|-----------|---------------------------------------|----------------------------------------|---------------------------------------|----------------------------------------|
|                |           | Haemolymph<br>(mmol l <sup>-1</sup> ) | Leg muscle<br>(mmol kg <sup>-1</sup> ) | Haemolymph<br>(mmol l <sup>-1</sup> ) | Leg muscle<br>(mmol kg <sup>-1</sup> ) |
| June (dry)     | FR        | 0.13±0.02                             | 0.12±0.03                              | 0.84±0.14                             | 2.09±0.65                              |
|                | Exercised | 0.20±0.02 <sup>†</sup>                | 1.20±0.29 <sup>†</sup>                 | 9.47±1.64 <sup>†</sup>                | 14.57±3.50 <sup>†</sup>                |
| February (wet) | FR        | 0.22±0.03*                            | 0.16±0.03                              | 0.68±0.20                             | 2.42±0.96                              |
|                | Exercised | 0.35±0.07* <sup>†</sup>               | 0.82±0.08 <sup>†</sup>                 | 8.97±0.74 <sup>†</sup>                | 13.3±2.5 <sup>†</sup>                  |

Haemolymph and leg muscle were taken from free-ranging crabs (FR) or crabs exercised for 5 min. <sup>†</sup> indicates a significant difference between FR and exercised crabs within each season (June or February). \* indicates a significant overall difference between seasons (June vs February) for either FR or exercised treatment groups. Two-factor ANOVA; *N*=8 for each treatment; total *N*=64.

the crabs exercising under humid conditions. In exercising *G. natalis*, *L*<sub>diff</sub> increased from 0.53 to 0.77 (Adamczewska and Morris, 1998) and in exercised *Potamonautes warreni* from 0.57 to 0.77 (Adamczewska et al., 1997). If *L*<sub>diff</sub> increases in *D. hirtipes* during severe exercise then this correlates with a 38% faster walking speed in crabs under 90% compared with 40% RH. This large effect of laboratory exercise in lowering haemolymph *P*<sub>O<sub>2</sub></sub> was not reflected in the oxygen content of *D. hirtipes* haemolymph, which remained generally high (the increase in [O<sub>2</sub>] in crabs exercised at 90% RH was due to unusually high [Hc]). The venous Hc O<sub>2</sub> saturation was significantly lower in the crabs exercised at 90% RH compared with both controls and those exercised at 40% RH. This relative lowering of venous Hc oxygenation is consistent with comparatively greater respiratory demand in that group, consequent on their faster locomotion.

The increased haemolymph calcium in both laboratory and field crabs may explain how Hc-O<sub>2</sub> saturation remained high despite the internal hypoxia. The O<sub>2</sub> affinity of *D. hirtipes* Hc is significantly improved by increased haemolymph Ca ( $\Delta\log P_{50}/\Delta\log[Ca^{2+}]=-0.45$  at pH 7.4) but is not sensitive to L-lactate (Dela-Cruz and Morris, 1997a). By employing the Bohr coefficient for the pH sensitivity of O<sub>2</sub> binding by *D. hirtipes* Hc ( $\theta=-0.57$ ; Dela-Cruz and Morris, 1997a), the *P*<sub>50</sub> of *D. hirtipes* Hc in laboratory exercised crabs at 90% RH would be

1.06 kPa. Incorporating the effect of increased Ca<sup>2+</sup> reduced the *P*<sub>50</sub> to 0.51 kPa in *D. hirtipes* exercised at 90% RH, which is an improvement of the Hc affinity for O<sub>2</sub> by 52%. In crabs exercised at 40% RH the Ca<sup>2+</sup> increase was less, thus the potentiation of Hc O<sub>2</sub> affinity was proportionately less and correlated with the less severe internal hypoxia.

In *Cardisoma guanhumi*, fatigue set in at a walking speed of 3 m min<sup>-1</sup> (Herreid et al., 1979), which was only slightly faster than 2.48 m min<sup>-1</sup> by *D. hirtipes* at 90% RH and was thus likely close to the maximum speed for *D. hirtipes*. While haemolymph L-lactate increased after 5 min exercise in the laboratory, 3–5 mmol l<sup>-1</sup> is not high for land crabs (e.g. Greenaway et al., 1988; Adamczewska and Morris, 1994, 1998). Short-term, vigorous exercise affected urate oxidase and increased haemolymph urate in *G. natalis* (Adamczewska and Morris, 1998) but in *D. hirtipes* 5 min laboratory exercise was insufficient to alter [urate<sup>-</sup>]. Furthermore, there was no significant hyperglycaemia until after the exercise demand had ceased.

In crustaceans, low rates of lactate reoxidation (0.8–2.6 mmol l<sup>-1</sup> h<sup>-1</sup>) are the norm (Wood and Randall, 1981b; Forster et al., 1989; Henry et al., 1994; Adamczewska and Morris, 1998) but the rate of 0.49 mmol l<sup>-1</sup> h<sup>-1</sup> in *D. hirtipes* exercised in the laboratory was unusually slow, although Henry et al. (1994) reached a similar conclusion for

Table 5. *The osmolality (OP) and the concentration of Ca<sup>2+</sup>, Na<sup>+</sup>, Cl<sup>-</sup>, Mg<sup>2+</sup>, K<sup>+</sup> and urate in the haemolymph of D. hirtipes sampled on Christmas Island*

|                |                | OP<br>(mOsm) | Concentration (mmol l <sup>-1</sup> ) |                 |                 |                  |                |             |
|----------------|----------------|--------------|---------------------------------------|-----------------|-----------------|------------------|----------------|-------------|
|                |                |              | Ca <sup>2+</sup>                      | Na <sup>+</sup> | Cl <sup>-</sup> | Mg <sup>2+</sup> | K <sup>+</sup> | Urate       |
| June (dry)     | Free ranging   | 501.1±22.0   | 5.0±0.4                               | 264.4±6.0       | 264.8±6.9       | 3.8±0.5          | 5.2±0.1        | 0.093±0.011 |
|                | 5 min exercise | 574.2±46.2*  | 9.1±1.2*                              | 284.9±13.9      | 276.0±8.0       | 4.9±0.4*         | 7.5±0.3*       | 0.075±0.012 |
| February (wet) | Free ranging   | 518.8±13.3   | 6.2±0.7                               | N/A             | N/A             | N/A              | N/A            | 0.121±0.027 |
|                | 5 min exercise | 577.6*       | 10.6*                                 | N/A             | N/A             | N/A              | N/A            | 0.115±0.018 |

The OP, Ca<sup>2+</sup> and urate were measured for crabs sampled during the dry season of 1994 or during the wet season, while Na<sup>+</sup>, Cl<sup>-</sup>, Mg<sup>2+</sup> and K<sup>+</sup> were determined for crabs sampled in the dry season. The crabs were sampled either during their normal behaviour or after 5 min exercise (*N*>8). Values are means ± S.E.M.

\*Significant effect of exercise.

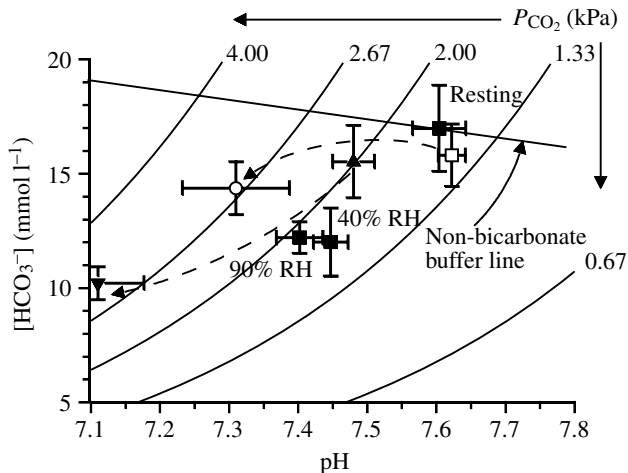

Fig. 2. The pH/[HCO<sub>3</sub><sup>-</sup>] diagram for acid-base variables measured in the arterial haemolymph of *Discoplax hirtipes* sampled in the field during the dry season (open square, free-ranging; open circle, 5 min exercise) and the wet, migration, season (triangles, free-ranging; inverted triangles, 5 min exercise), compared with laboratory values for resting blue crabs and those exercised for 5 min at either 40% or 90% relative humidity (filled squares). The acid-base perturbations after 5 min of exercise are indicated by the broken lines with arrowheads (without implying acid-base state at times within the 5 min exercise period). The non-bicarbonate buffer line is provided (Dela-Cruz and Morris, 1997a). The  $P_{\text{CO}_2}$  isopleths were calculated according to the Henderson-Hasselbalch equation using  $\alpha\text{CO}_2 = 0.3068 \mu\text{mol l}^{-1} \text{ Pa}^{-1}$  and  $pK_a = 6.08$ .

*C. guanhumi*. Thus, in the long term, migrating *D. hirtipes* would be severely constrained to within the MAS. In *D. hirtipes*, mobilised glucose accumulates in the haemolymph while lactate is being re-oxidised. The primary site for glucose mobilisation in land crabs appears to be the leg muscles (Morris and Adamczewska, 2002). The simplest explanation is that, subsequent to short-term exercise, glucose continues to flux from the muscle of *D. hirtipes* under conditions where  $\text{O}_2$  supply is restored and L-lactate can slowly re-enter into the respiratory pathway, obviating the need for elevated glycolysis.

The consequences of exercise were obvious in the haemolymph  $\text{CO}_2$  status and associated acid-base state. The general consequence of 5 min exercise by *D. hirtipes* in the laboratory was decreased  $[\text{CO}_2]$  and pH together with increased  $P_{\text{CO}_2}$ , which, with the aid of the Henderson-Hasselbalch diagram (Fig. 2), was seen to include a large metabolic (lactate) acidosis.

These data are also consistent with different work loads (walking speeds) between the groups and/or differential lactate and  $\text{H}^+$  efflux rates. Assuming that the L-lactate efflux into the haemolymph was accompanied by a stoichiometric efflux of  $\text{H}^+$ , the haemolymph pH due to metabolic acid [ $\text{pH}_{a(m)}$ ] could be predicted for each crab (for method, see Greenaway et al., 1988; as derived from Wood et al., 1977). The haemolymph of crabs exercised at 90% RH was  $\text{pH}_a = 7.40$ , which was not different to the  $\text{pH}_a = 7.45$  in those crabs exercised at 40% RH

(Table 1; Fig. 2). The corresponding increases in haemolymph lactate were  $3.44$  and  $5.17 \text{ mmol l}^{-1}$ , respectively, which provided a statistically unchanged  $\text{pH}_a = 7.48$  for the crabs in 40% RH but a higher  $\text{pH}_a = 7.51 \pm 0.02$  in those crabs exercised in 90% RH (paired  $t$ -test,  $T = -4.63$ ,  $P = 0.002$ ). Thus, in *D. hirtipes* exercised at 90% RH, there appears to be a preferential retention of L-lactate over  $\text{H}^+$  by the tissues, perhaps as a consequence of the severity and brevity of the exercise period (see table 2 in Adamczewska et al., 1997). When land crabs were exercised to exhaustion, the L-lactate efflux exceeded that of  $\text{H}^+$  (e.g. Greenaway et al., 1988; Adamczewska and Morris, 1994b) whereas *G. natalis* under non-exhausting conditions (Adamczewska and Morris, 1998) exhibit values similar to those from *D. hirtipes*.

Behavioural responses to humidity are paramount since the differences between the *D. hirtipes* exercised at 40% and 90% RH were not directly debilitating effects of low humidity but rather are due to an increased proclivity to exercise at higher humidity. The increased commitment to walking in 90% RH accounts for the relative internal hypoxia as well for the deeper hypercapnic lactacidosis.

#### Exercise in the field and relevance to the seasonal migration

The free-ranging *D. hirtipes* during the dry season were constrained in their distribution around freshwater seepages, were relatively inactive and moved only short distances (Hicks et al., 1990; Greenaway and Raghaven, 1998; S.M., unpublished radio-tracking data). Free-ranging *D. hirtipes* in the wet season were migrating and walked persistently but not continuously during the daylight hours. The establishment of the wet season is a requirement for the migration (Hicks et al., 1990; S.M., personal observations), and the resultant seasonal differences in the behaviour of free-ranging crabs correlate with changes in the haemolymph respiratory gas status. Thus, the relative humidity does not affect  $\text{O}_2$  transport directly but instead determines the behaviour of the animal and thereby the demands that the crabs then make on their oxygen uptake and transport systems.

The haemolymph  $P_{\text{O}_2}$  of free-ranging crabs in June was not different from that measured in crabs at rest in the laboratory, implying that the *D. hirtipes* were indeed quiescent in the field during the dry season. However, in the wet season, the  $P_{\text{O}_2}$  values of migrating crabs declined markedly and were similar to those of exercised crabs in the laboratory. Thus, while  $L_{\text{diff}}$  was  $0.44$  in quiescent dry season crabs, the uptake of  $\text{O}_2$  was more severely diffusion limited in the migrating *D. hirtipes* ( $L_{\text{diff}} = 0.75$ ). Superimposing 5 min exercise on the quiescent dry season animals further reduced their haemolymph  $P_{\text{O}_2}$  and increased  $L_{\text{diff}}$  to  $0.95$ , as in the laboratory exercised crabs. In the wet season animals that were migrating, the extra 5 min exercise load failed to elicit any further reduction in  $P_{\text{O}_2}$ , and  $L_{\text{diff}}$  remained at  $0.78$ .

The low  $P_{\text{O}_2}$  of the haemolymph in naturally migrating crabs was again not manifested in low  $\text{O}_2$  content because of the high affinity of the Hc for  $\text{O}_2$ . The apparent decreased  $\text{O}_2$  content in crabs exercised during February was due to relatively low

[Hc] since the % saturation was unaffected (Table 3). In June (dry season), subsequent to the 5 min exercise, the increase in  $\text{Ca}^{2+}$  content would have decreased the  $P_{50}$  (increased  $\text{O}_2$  affinity) from 1.21 to 0.91 kPa, and in the migrating wet season crabs from 1.60 to 1.18 kPa. Actively foraging *G. natalis* on Christmas Island in the wet season exhibited a relative haemolymph hypoxia (2.9 kPa) compared with the relatively inactive crabs in the dry season, which correlated with activity (Adamczewska and Morris, 2000a).

Migrating crabs in the wet season maintained low L-lactate levels, indistinguishable from those in June during the dry season. Therefore, the breeding migration of blue crabs is completely aerobic, and within the MAS. Migrating *G. natalis* also exhibited low and constant haemolymph lactate levels (Adamczewska and Morris, 2001b) and this may be a feature of gecarcinid land crabs. The elevated  $\text{O}_2$  demand of migrating crabs (Feb) compared with those confined to around the freshwater springs in June is reflected in a relative hyperglycaemia typical of exercised crustaceans (England and Baldwin, 1983; Morris and Adamczewska, 1994b, 2002). In both June and February, the 5 min imposed exercise elevated haemolymph lactate to a similar extent, at least  $9 \text{ mmol l}^{-1}$ , and tissue [lactate] also increased similarly in both groups despite the obvious differences in the haemolymph  $P_{\text{O}_2}$  changes. The data are consistent with migrating *D. hirtipes* walking close to their aerobic limit during which time pulmonary  $P_{\text{O}_2}$  is maximally depressed,  $\text{O}_2$  uptake diffusion limited, and the arterial-venous (a-v)  $P_{\text{O}_2}$  difference minimised (albeit with little effect on the a-v Hc  $\text{O}_2$  difference). Extra exercise imposed a requirement that exceeds the aerobic scope and requires anaerobic supplementation.

As with the haemolymph oxygenation, the  $\text{CO}_2$  and acid-base status of relatively inactive crabs during the dry season was similar to that of resting crabs in the laboratory (Fig. 2). Red crabs, *G. natalis*, on Christmas Island showed a seasonal respiratory acidosis such that actively foraging crabs in the wet season accumulated an extra  $3 \text{ mmol l}^{-1}$  of  $\text{CO}_2$  and a decrease in pH of 0.13 compared with the relatively inactive crabs in the dry season (Adamczewska and Morris, 2002a). The migrating *D. hirtipes* were similarly acidotic compared with the quiescent dry-season animals due to a respiratory acidosis with no evidence of any metabolic component (Fig. 2). Consequently, requiring the dry season (June) animals to exercise elicited both a respiratory component to the ensuing acidosis (as exhibited by migrating crabs) and a metabolic component, as evidenced by the accumulated lactate. The fundamentally different basic respiratory state of the wet-season animals, close to their aerobic limit, compared with dry-season crabs meant that when the additional exercise was imposed on migrating blue crabs the acidosis was primarily metabolic in origin.

Adamczewska and Morris (1998) concluded that burst locomotion has significant disadvantages if it exceeds the MAS and if the crabs, like *D. hirtipes*, have slow rates of lactate re-oxidation (e.g. Henry et al., 1994; Morris and Adamczewska, 2002). Migrating *D. hirtipes* remain aerobic but exhibit a

hypoxic respiratory acidosis compared with those in the dry season. Any extra energetic demand requires the recruitment of anaerobiosis and a debt that, in *D. hirtipes*, would require many hours to repay and impair subsequent exercise capacity. The best strategy for migrating blue crabs would appear similar to that of *G. natalis*, to walk continuously but not to exceed the MAS. During the dry season, extensive walking is resisted by either species. In *D. hirtipes*, the seasonal activity is inextricably linked to ion and water homeostasis, which modify the extent of activity which the animals can engage in and, thereby, the seasonal metabolic and respiratory demands. It is apparent from the laboratory trials and field observations that *D. hirtipes* responds to ambient humidity and limits, even under imposed locomotion, the commitment to exercise when at lower RH. This humidity sensitivity is integral to the seasonal behaviour and thus to the resulting routine metabolic demands in different seasons and to migration of the crabs.

Thanks go to the conservator and staff of Parks Australia, Christmas Island for their hospitality and assistance during the work. Thanks go also to Agnieszka Adamczewska for invaluable assistance in the field and with the blood gas and metabolite determinations in the laboratory.

## References

- Adamczewska, A. M. and Morris, S. (1994a). Exercise in the terrestrial Christmas Island Red Crab *Gecarcoidea natalis*. I. Blood gas transport. *J. Exp. Biol.* **188**, 235-256.
- Adamczewska, A. M. and Morris, S. (1994b). Exercise in the terrestrial Christmas Island Red Crab *Gecarcoidea natalis*. II. Energetics of locomotion. *J. Exp. Biol.* **188**, 257-274.
- Adamczewska, A. M. and Morris, S. (1996). The respiratory gas transport, acid-base state, ion and metabolite status of the Christmas Island Blue Crab, *Cardisoma hirtipes* (Dana) assessed *in situ* with respect to immersion. *Physiol. Zool.* **69**, 67-92.
- Adamczewska, A. M. and Morris, S. (1998). Strategies for migration in the terrestrial Christmas Island red crab *Gecarcoidea natalis*: intermittent versus continuous locomotion. *J. Exp. Biol.* **201**, 3221-3231.
- Adamczewska, A. M. and Morris, S. (2000a). Respiratory gas transport, metabolic status and locomotor capacity of the Christmas Island red crab *Gecarcoidea natalis* assessed in the field with respect to dichotomous seasonal activity levels. *J. Exp. Zool.* **286**, 552-562.
- Adamczewska, A. M. and Morris, S. (2000b). Locomotion, respiratory physiology, and energetics of amphibious and terrestrial crabs. *Physiol. Biochem. Zool.* **73**, 705-725.
- Adamczewska, A. M. and Morris, S. (2001a). Ecology and behavior of *Gecarcoidea natalis*, the Christmas Island red crab, during the annual breeding migration. *Biol. Bull.* **200**, 305-320.
- Adamczewska, A. M. and Morris, S. (2001b). Metabolic status and respiratory physiology of *Gecarcoidea natalis*, the Christmas Island red crab, during the annual breeding migration. *Biol. Bull.* **200**, 321-335.
- Adamczewska, A. M., van Aardt, W. J. and Morris, S. (1997). The role of lungs and gills in an African freshwater crab *Potamonautes warreni* (Calman), (Decapoda, Potamoidea) in gas exchange with water, with air and during exercise. *J. Crust. Biol.* **17**, 596-608.
- Bergmeyer, H. U. (1985). *Methods of Enzymatic Analysis*, vol. 6, 2nd edition. Weinheim: VCH Verlagsgesellschaft.
- Booth, C. E., McMahon, B. R., De Fur, P. L. and Wilkes, P. R. H. (1984). Acid-base regulation during exercise and recovery in the blue crab, *Callinectes sapidus*. *Resp. Physiol.* **58**, 359-376.
- Bridges, C. R., Bicudo, J. E. P. W. and Lykkeboe, G. (1979). Oxygen content measurement in blood containing haemocyanin. *Comp. Biochem. Physiol.* **62**, 457-462.
- Burggren, W. W. and McMahon, B. R. (1981). Hemolymph oxygen transport, acid-base status, and hydromineral regulation during dehydration

- in three terrestrial crabs, *Cardisoma*, *Birgus* and *Coenobita*. *J. Exp. Zool.* **218**, 53-64.
- Cameron, J. N.** (1971). Rapid method for determination of total carbon dioxide in small blood samples. *J. App. Physiol.* **31**, 632-634.
- Davie, P. J. F.** (2002). Crustacea, Malacostraca, Eucarida (Part 2): Decapoda—Anomura, Brachyura. In *Zoological Catalogue of Australia*, vol. 19.3B (ed. A. Wells and W. W. K. Houston), pp. 183-186. Melbourne: CSIRO Publishing.
- Dela-Cruz, J. and Morris, S.** (1997a). Respiratory, acid-base, and metabolic responses of the Christmas Island blue crab, *Cardisoma hirtipes* (Dana) to simulated immersion. *Physiol. Zool.* **70**, 100-115.
- Dela-Cruz, J. and Morris, S.** (1997b). Water and ion balance, and nitrogenous excretion as limitations to aerial excursion in the Christmas Island blue crab, *Cardisoma hirtipes* (Dana). *J. Exp. Zool.* **279**, 537-548.
- England, W. R. and Baldwin, J.** (1983). Anaerobic energy metabolism in the tail musculature of the Australian yabby *Cherax destructor* (Crustacea, Decapoda, Parastacidae): role of phosphagens and anaerobic glycolysis during escape behaviour. *Physiol. Zool.* **56**, 614-622.
- Farrelly, C. A. and Greenaway, P.** (1992). Morphology and ultrastructure of the gills of terrestrial crabs (Crustacea, Gecarcinidae and Grapsidae): adaptations for air-breathing. *Zoomorphology* **112**, 39-49.
- Farrelly, C. A. and Greenaway, P.** (1993). Land crabs with smooth lungs: Grapsidae, Gecarcinidae, and Sundathelphusidae ultrastructure and vasculature. *J. Morph.* **215**, 245-260.
- Farrelly, C. A. and Greenaway, P.** (1994). Gas exchange through the lungs and gills in air-breathing crabs. *J. Exp. Biol.* **187**, 113-130.
- Forster, M. E., Waldron, F. M. and Taylor, H. H.** (1989). Recovery from exhausting exercise in a bimodally breathing crab, *Leptograpsus variegatus* (Decapoda: Grapsidae). *J. Exp. Mar. Biol. Ecol.* **127**, 165-173.
- Full, R. J. and Herreid, C. F.** (1984). Fiddler crab exercise: the energetic cost of running sideways. *J. Exp. Biol.* **109**, 141-161.
- Full, R. J. and Weinstein, R. B.** (1992). Integrating the physiology, mechanics and behaviour of rapid running ghost crabs: slow and steady doesn't always win the race. *Am. Zool.* **32**, 382-395.
- Gibson-Hill, C. A.** (1947). Field notes on the terrestrial crabs. *Bull. Raffles Mus.* **18**, 43-52.
- Gifford, C. A.** (1962). Some observations on the general biology of the land crab *Cardisoma guanhumi* (Latreille) in South Florida. *Biol. Bull.* **97**, 207-223.
- Gray, H. S.** (1995). *Christmas Island Naturally*. Christmas Island, Indian Ocean: Christmas Island Natural History Society.
- Greenaway, P. and Raghaven, S.** (1998). Digestive strategies in two species of leaf-eating land crabs (Brachyura: Gecarcinidae) in a Rain Forest. *Physiol. Zool.* **71**, 36-44.
- Greenaway, P., Morris, S. and McMahon, B. R.** (1988). Adaptations to a terrestrial existence by the Robber Crab *Birgus latro*. II. *In vivo* respiratory gas exchange and transport. *J. Exp. Biol.* **140**, 493-509.
- Harris, R. R. and Kormanik, G. A.** (1981). Salt and water balance and antennal gland function in three species of terrestrial crab (*Gecarcoidea lalandii*, *Cardisoma carnifex*, *Birgus latro*). II. The effects of desiccation. *J. Exp. Zool.* **218**, 107-116.
- Henry, R. P., Booth, C. E., Lallier, F. H. and Walsh, P. J.** (1994). Post-exercise lactate production and metabolism in three species of aquatic and terrestrial decapod crustaceans. *J. Exp. Biol.* **186**, 215-234.
- Herreid, C. F. and Full, R. J.** (1988). Energetics and locomotion. In *Biology of the Land Crabs* (ed. W. W. Burggren and B. R. McMahon), pp. 333-377. New York: Cambridge University Press.
- Herreid, C. F., Lee, L. W. and Shah, G. M.** (1979). Respiration and heart rate in exercising land crabs. *Resp. Physiol.* **37**, 109-120.
- Hicks, J., Rumpff, H. and Yorkston, H.** (1990). *Christmas Crabs*. Christmas Island, Indian Ocean: Christmas Island Natural History Society.
- Innes, A. J. and Taylor, E. W.** (1986). The evolution of air breathing in crustaceans: A functional analysis of branchial, cutaneous and pulmonary gas exchange. *Comp. Biochem. Physiol.* **85A**, 621-637.
- Klaassen, F.** (1975). Ecological and ethological studies on the reproductive biology of *Gecarcinus lateralis* (Decapoda, Brachyura). *Forma Functio* **8**, 101-174.
- Linton, S. M. and Greenaway, P.** (2000). The nitrogen requirements and dietary nitrogen utilization for the gecarcinid land crab *Gecarcoidea natalis*. *Physiol. Zool.* **73**, 209-218.
- McMahon, B. R.** (1981). Oxygen uptake and acid-base balance during activity in decapod crustaceans. In *Locomotion and Energetics in Arthropods* (ed. C. F. Herreid and C. R. Fourtner), pp. 299-335. New York: Plenum Press.
- McMahon, B. R., McDonald, D. G. and Wood, C. M.** (1979). Ventilation, oxygen uptake and haemolymph oxygen transport, following enforced exhausting activity in the Dungeness crab *Cancer magister*. *J. Exp. Biol.* **80**, 271-285.
- Morris, S.** (2002). The ecophysiology of air-breathing in crabs with special reference to *Gecarcoidea natalis*. *Comp. Biochem. Physiol.* **131B**, 559-570.
- Morris, S. and Adamczewska, A. M.** (1996). Respiratory, acid-base and ion status during voluntary immersion of the air-breathing crab *Cardisoma carnifex* assessed *in situ*. *J. Exp. Mar. Biol. Ecol.* **206**, 149-164.
- Morris, S. and Adamczewska, A. M.** (2002). Utilization of glycogen, ATP and arginine phosphate in exercise and recovery in terrestrial red crabs, *Gecarcoidea natalis*. *Comp. Biochem. Physiol.* **133A**, 391-403.
- Morris, S. and Dela-Cruz, J.** (1998). The ecophysiological significance of lung air retention during submersion by the air-breathing crabs *Cardisoma carnifex* and *Cardisoma hirtipes*. *Exp. Biol. Online* **3**, 1-15.
- Nickerson, K. W. and Van Holde, K. E.** (1971). A comparison of molluscan and arthropod hemocyanin. I. Circular dichroism and absorption spectra. *Comp. Biochem. Physiol.* **39**, 855-872.
- Piiper, J.** (1982). A model for evaluating diffusion limitations in gas-exchange organs of vertebrates. In *A Companion to Animal Physiology* (ed. C. R. Taylor, K. Johansen and L. Bolis), pp. 49-64. Cambridge: Cambridge University Press.
- Taylor, H. H. and Greenaway, P.** (1984). The role of the gills and branchiostegites in gas-exchange in a bimodally breathing crab, *Holthuisana transversa* – evidence for a facultative change in the distribution of the respiratory circulation. *J. Exp. Biol.* **111**, 103-121.
- Taylor, H. H. and Taylor, E. W.** (1992). Gills and lungs: the exchange of gases and ions. In *Microscopic Anatomy of Invertebrates*, vol. 10 (ed. F. W. Harrison and M. Locke), pp. 203-293. New York: Wiley Publishing.
- Tucker, V. A.** (1967). Method for oxygen content and dissociation curves on microliter blood samples. *J. Appl. Physiol.* **23**, 410-414.
- van Aardt, W. J.** (1990). Oxygen uptake and haemocyanin oxygen affinity of *Potamonautes warreni* Calman after exercise. *S. Afr. J. Zool.* **25**, 11-17.
- Weinstein, R. B.** (1995). Locomotor behavior of nocturnal ghost crabs on the beach: focal animal sampling and instantaneous velocity from three dimensional motion analysis. *J. Exp. Biol.* **198**, 989-999.
- Weinstein, R. B. and Full, R. J.** (1992). Intermittent exercise alters endurance in an eight-legged ectotherm. *Am. J. Physiol.* **262**, R852-R859.
- Weinstein, R. B. and Full, R. J.** (1994). Thermal dependence of locomotor energetics and endurance capacity in the ghost crab, *Ocypode quadrata*. *Physiol. Zool.* **67**, 855-872.
- Weinstein, R. B., Full, R. J. and Ahn, A. N.** (1994). Moderate dehydration decreases locomotor performance of the ghost crab, *Ocypode quadrata*. *Physiol. Zool.* **67**, 873-891.
- Wood, C. M. and Randall, D. J.** (1981a). Oxygen and carbon dioxide exchange during exercise in the land crab *Cardisoma carnifex*. *J. Exp. Zool.* **218**, 7-22.
- Wood, C. M. and Randall, D. J.** (1981b). Haemolymph gas transport, acid-base regulation, and anaerobic metabolism during exercise in the land crab (*Cardisoma carnifex*). *J. Exp. Zool.* **218**, 23-35.
- Wood, C. M., McMahon, B. R. and McDonald, D. G.** (1977). An analysis of changes in hemolymph pH following exhausting activity in the starry flounder, *Platichthys stellatus*. *J. Exp. Biol.* **69**, 173-185.
- Wolcott, T. G.** (1988). Ecology. In *Biology of the Land Crabs* (ed. W. W. Burggren and B. R. McMahon), pp. 55-95. New York: Cambridge University Press.
